# Supplementary material for: Two new fluorinated copolymers based on thieno[2,3-f]benzofuran for efficient polymer solar cells
Source: Royal Society of Chemistry journal article supplement (doi:10.1039/c6ra09791j), 2016-01-01
Supplement: c6ra09791j1.pdf [file c6ra09791j1.pdf]

## Electronic Supplementary Information

### Two new fluorinated copolymers based on thieno[2,3-*f*]benzofuran for efficient polymer solar cells

Dingjun He<sup>a</sup>, Lixia Qiu<sup>a</sup>, Zhiguo Zhang<sup>b</sup>, Yongfang Li<sup>b</sup>, Chunyue Pan<sup>a</sup>, Yingping Zou<sup>a\*</sup>

*a.* College of Chemistry and Chemical Engineering, Central South University, Changsha 410083, China. E-mail: yingpingzou@csu.edu.cn(Y.Zou)

*b.* Beijing National Laboratory for Molecular Sciences, Institute of Chemistry, Chinese Academy of Sciences, Beijing 100190, China.

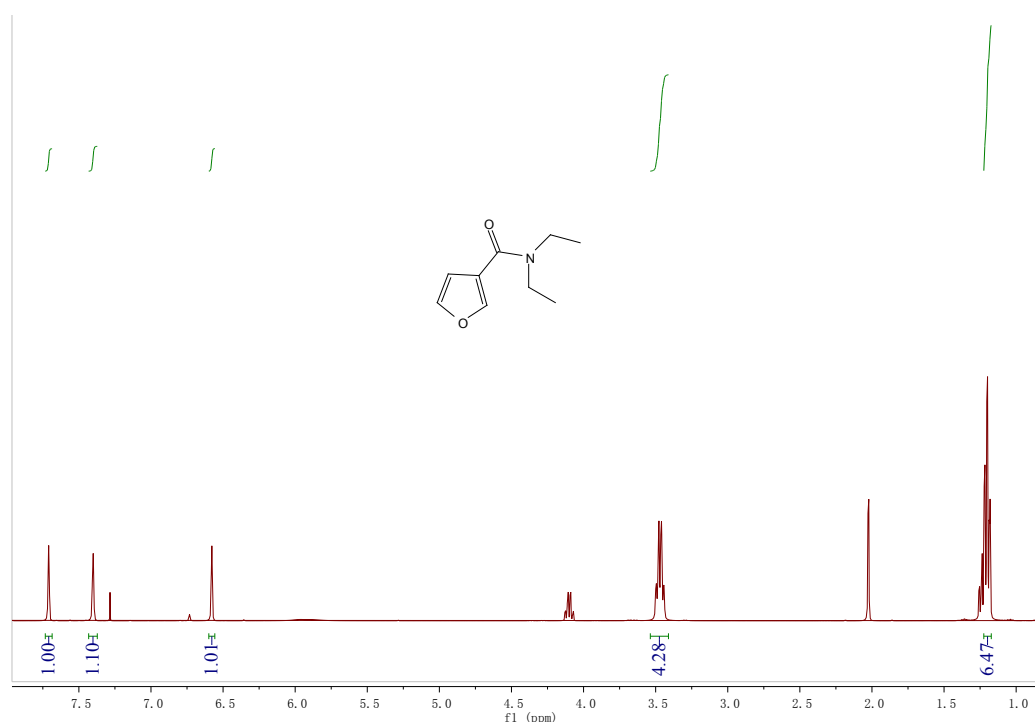

Figure S1. <sup>1</sup>H NMR spectrum of compound 1.

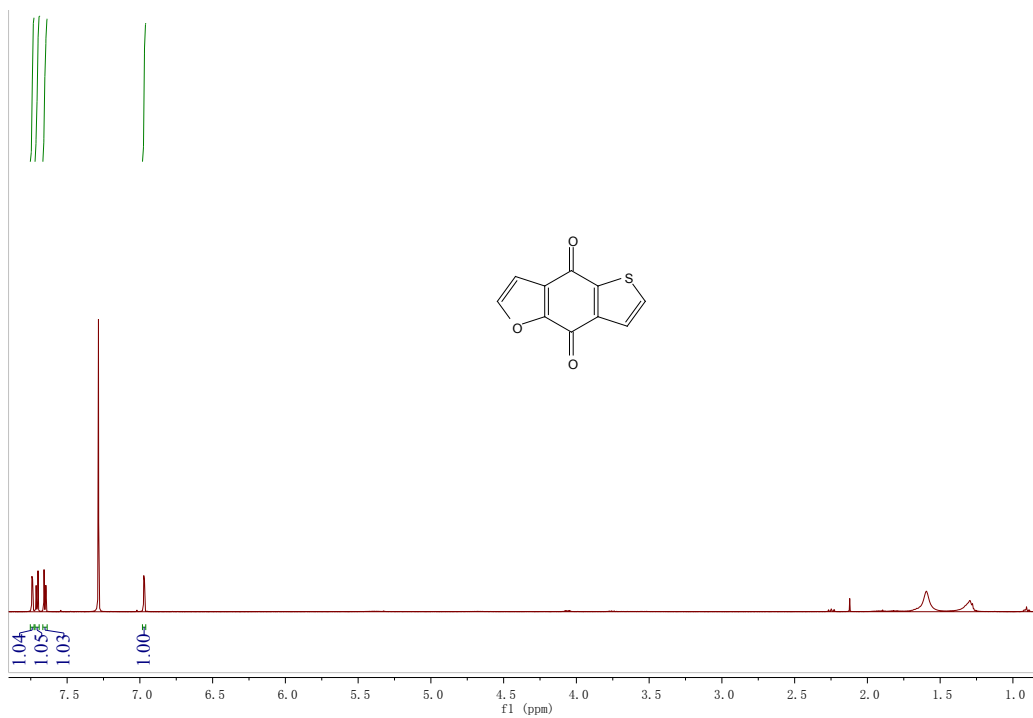

Figure S2. <sup>1</sup>H NMR spectrum of compound 2.

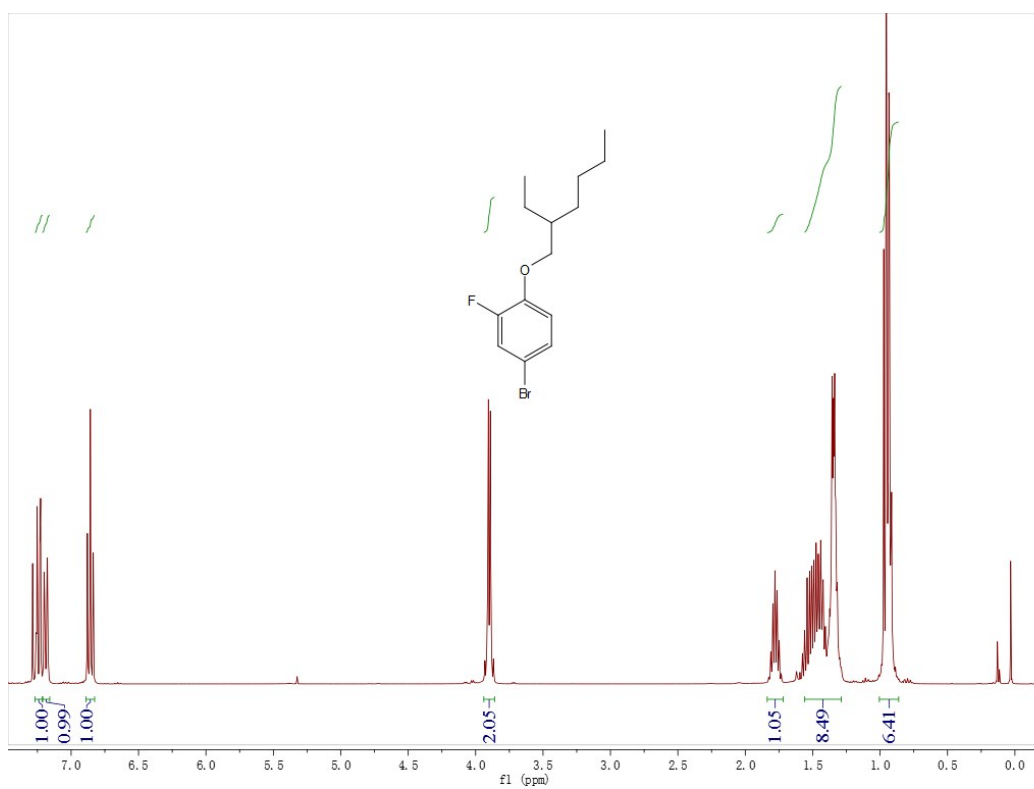

Figure S3. <sup>1</sup>H NMR spectrum of compound 3.

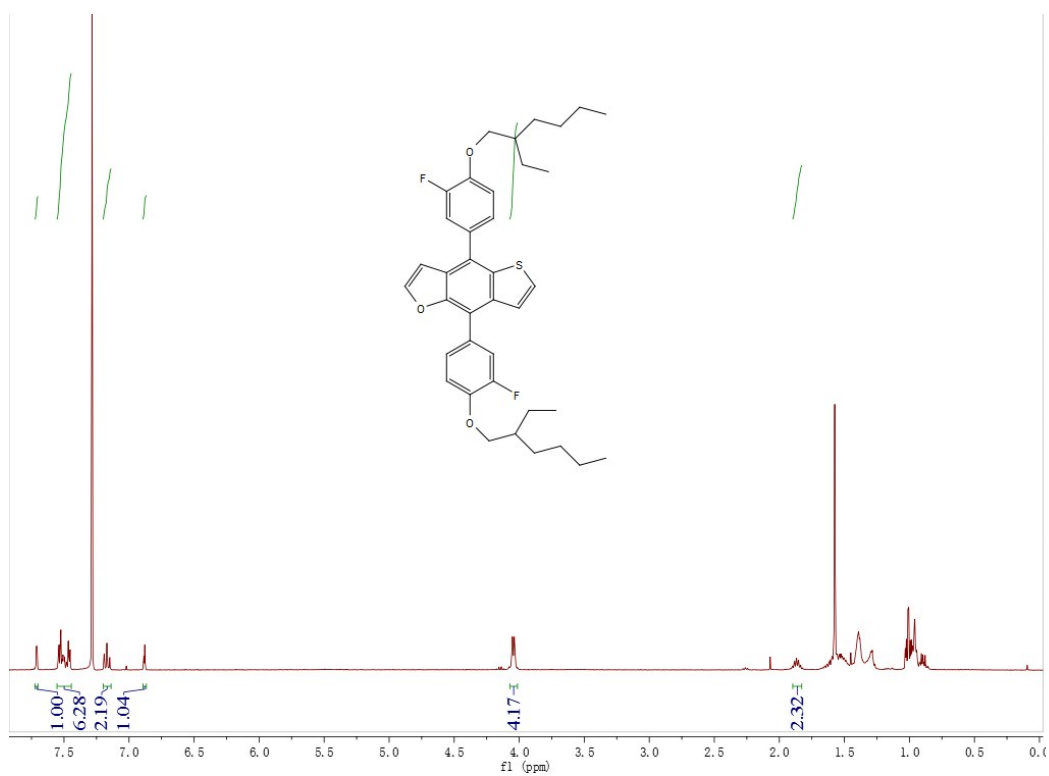

Figure S4. <sup>1</sup>H NMR spectrum of compound 4.

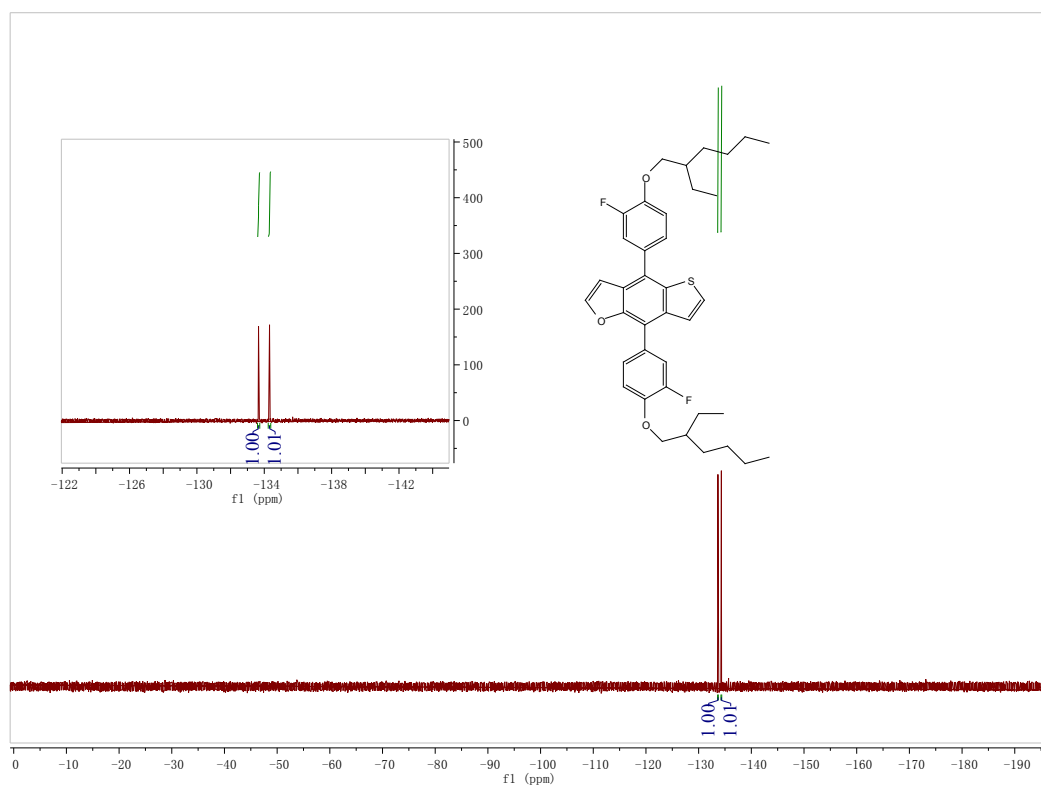

Figure S5. <sup>19</sup>F NMR spectrum of compound 4.

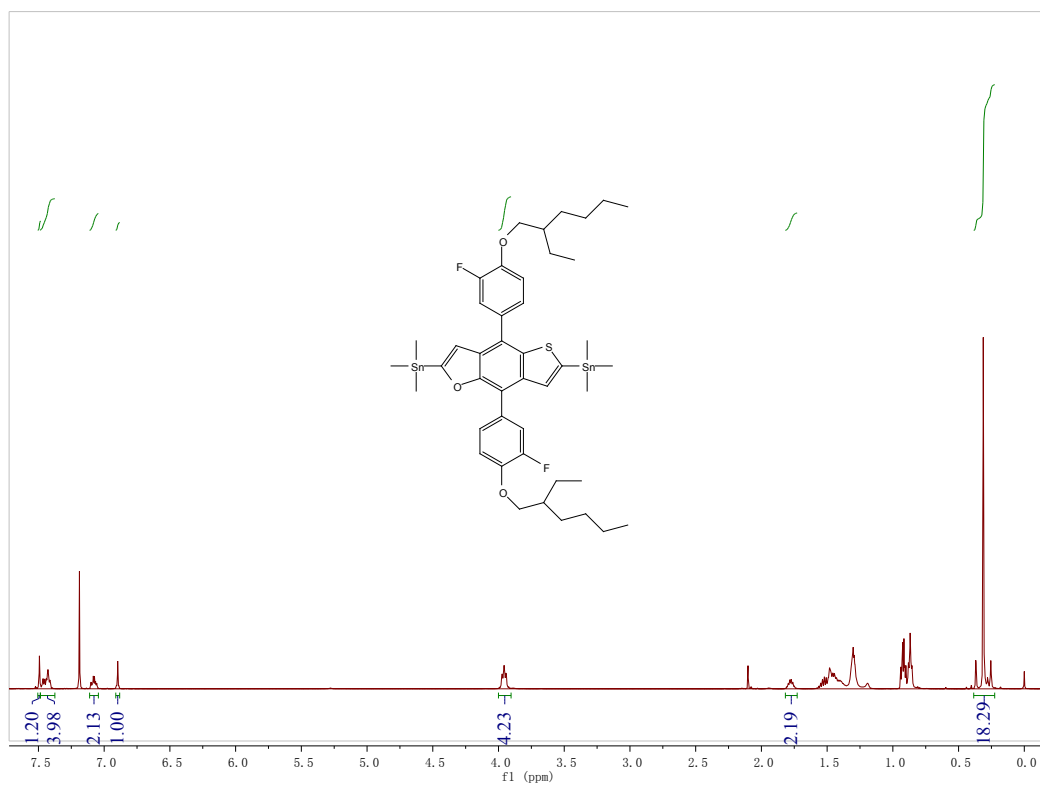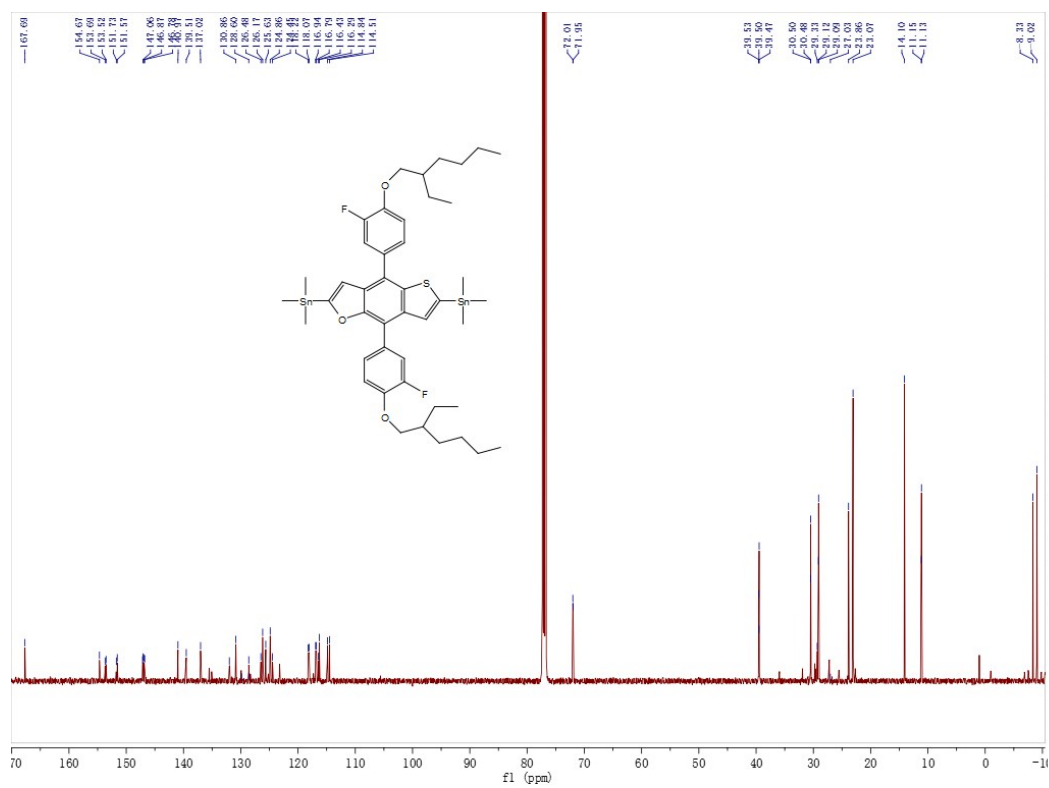

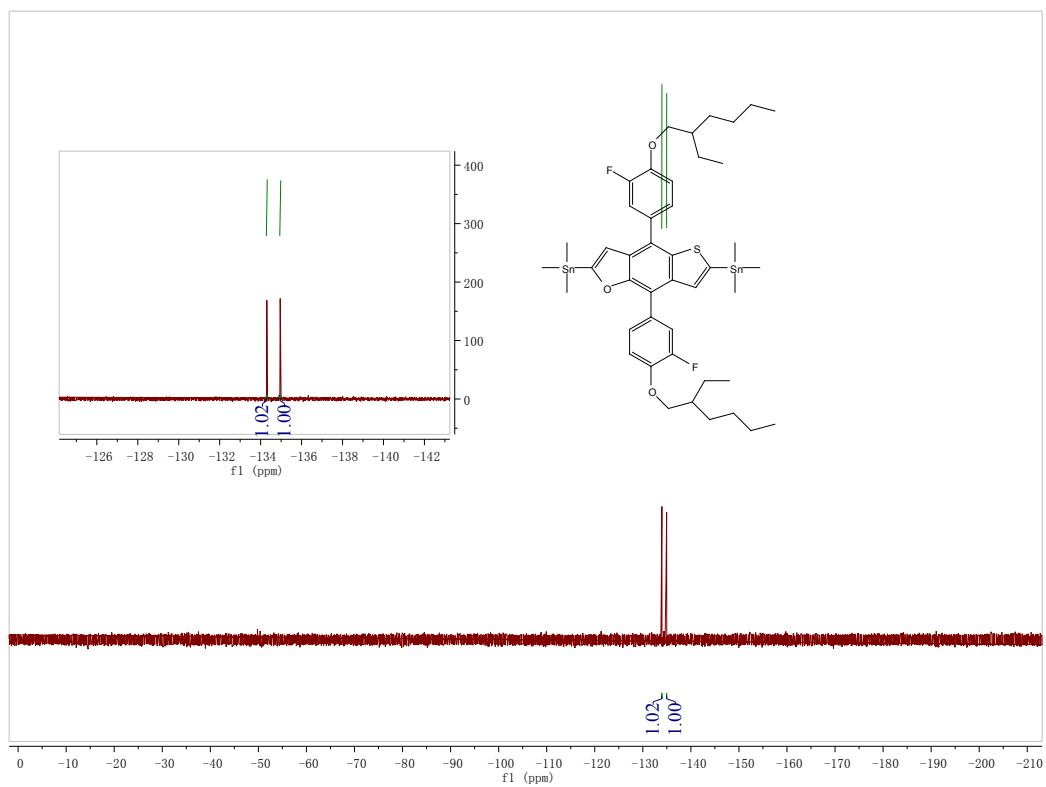

Figure S8.  $^{19}\text{F}$ NMR spectrum of compound M1.

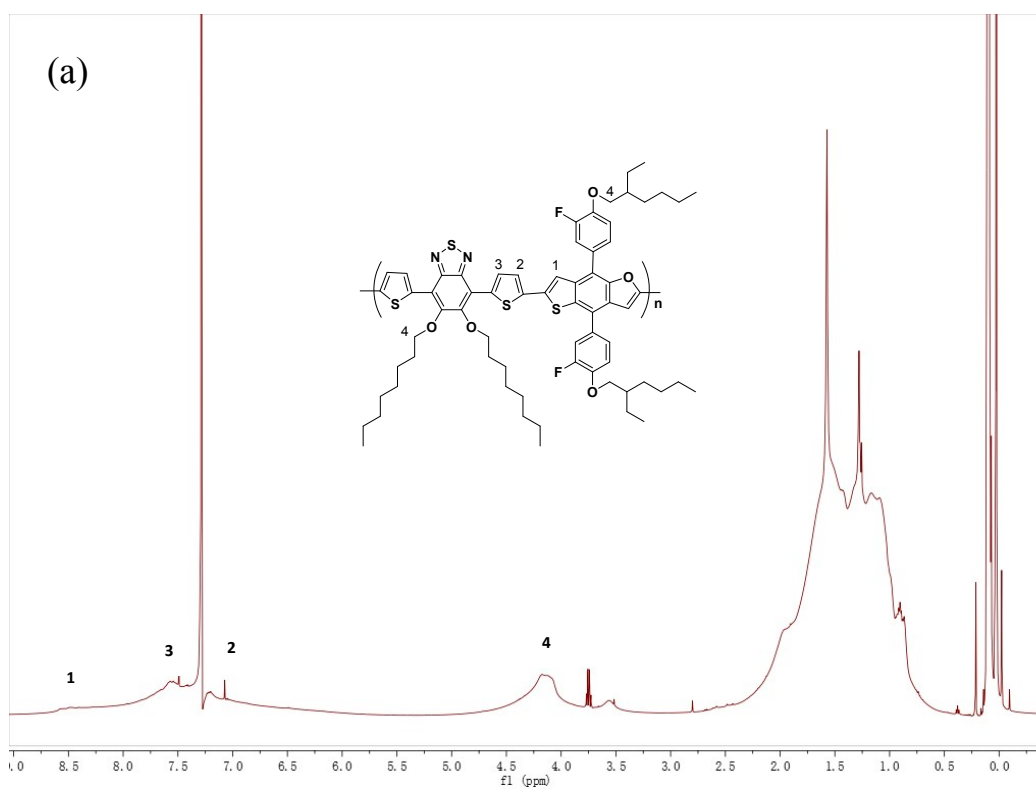

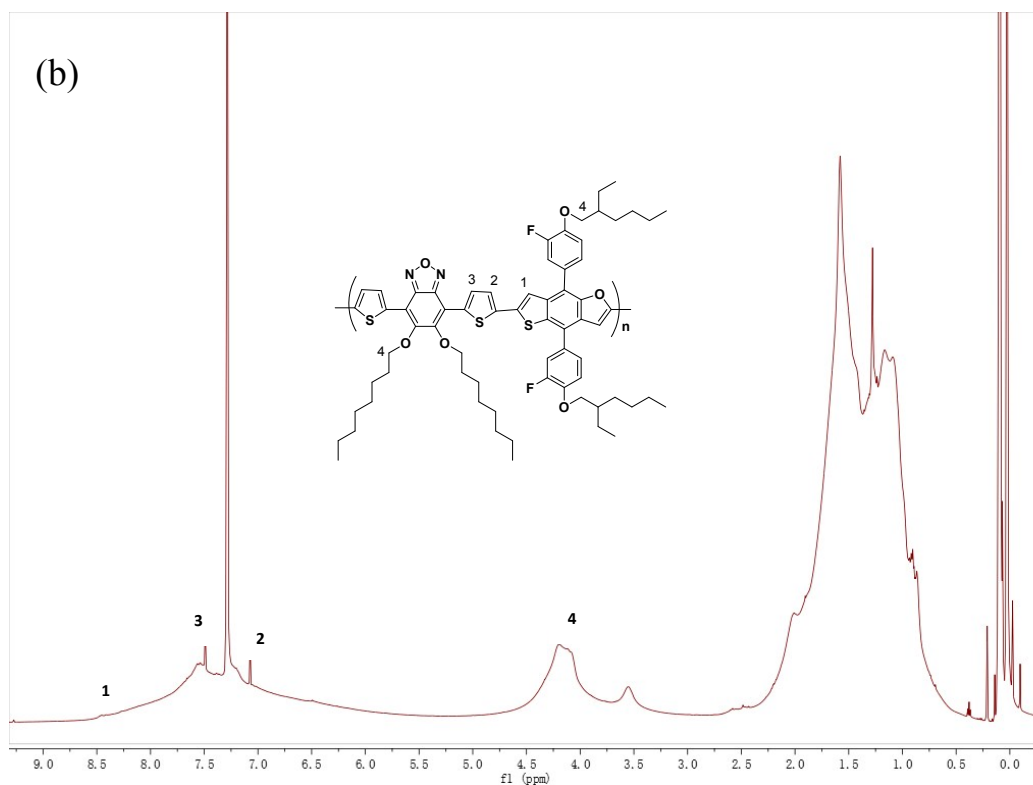

Figure S9. <sup>1</sup>H NMR spectra of TBFPF-BT (a) and TBFPF-BO (b).

Table S1. Photovoltaic parameters of devices under diverse weight ratio of D/A.

| Active layer                 | D/A<br>ratio(w/w) | V <sub>oc</sub> (V) | J <sub>sc</sub><br>(mA cm <sup>-2</sup> ) | FF(%) | PCE(%) |
|------------------------------|-------------------|---------------------|-------------------------------------------|-------|--------|
| TBFPF-BT:PC <sub>71</sub> BM | 1:1               | 0.81                | 5.94                                      | 63    | 3.05   |
| TBFPF-BT:PC <sub>71</sub> BM | 1:2               | 0.82                | 7.64                                      | 67    | 4.27   |
| TBFPF-BO:PC <sub>71</sub> BM | 1:1               | 0.90                | 8.23                                      | 52    | 3.86   |
| TBFPF-BO:PC <sub>71</sub> BM | 1:2               | 0.91                | 7.76                                      | 57    | 4.07   |

Table S2. Photovoltaic parameters of devices with different DIO ratio.

| Active layer <sup>a</sup>    | DIO (v<br>%) | V <sub>oc</sub> (V) | J <sub>sc</sub><br>(mA<br>cm <sup>-2</sup> ) | FF(%) | PCE(%) |
|------------------------------|--------------|---------------------|----------------------------------------------|-------|--------|
| TBFPF-BT:PC <sub>71</sub> BM | 0            | 0.82                | 7.64                                         | 67    | 4.27   |
| TBFPF-BT:PC <sub>71</sub> BM | 0.5          | 0.79                | 10.67                                        | 67    | 5.59   |
| TBFPF-BT:PC <sub>71</sub> BM | 1            | 0.80                | 12.12                                        | 71    | 6.80   |
| TBFPF-BT:PC <sub>71</sub> BM | 1.5          | 0.80                | 11.12                                        | 66    | 5.92   |
| TBFPF-BT:PC <sub>71</sub> BM | 3            | 0.79                | 10.42                                        | 67    | 5.50   |
| TBFPF-BT:PC <sub>71</sub> BM | 5            | 0.79                | 8.96                                         | 71    | 5.07   |
| TBFPF-BO:PC <sub>71</sub> BM | 0            | 0.91                | 7.76                                         | 57    | 4.07   |
| TBFPF-BO:PC <sub>71</sub> BM | 0.5          | 0.89                | 8.82                                         | 58    | 4.54   |
| TBFPF-BO:PC <sub>71</sub> BM | 1            | 0.89                | 10.35                                        | 65    | 5.98   |
| TBFPF-BO:PC <sub>71</sub> BM | 1.5          | 0.90                | 9.47                                         | 61    | 5.19   |
| TBFPF-BO:PC <sub>71</sub> BM | 3            | 0.90                | 8.76                                         | 59    | 4.60   |
| TBFPF-BO:PC <sub>71</sub> BM | 5            | 0.89                | 8.49                                         | 59    | 4.46   |

<sup>a</sup> Polymer:PC<sub>71</sub>BM=1:2(w/w)

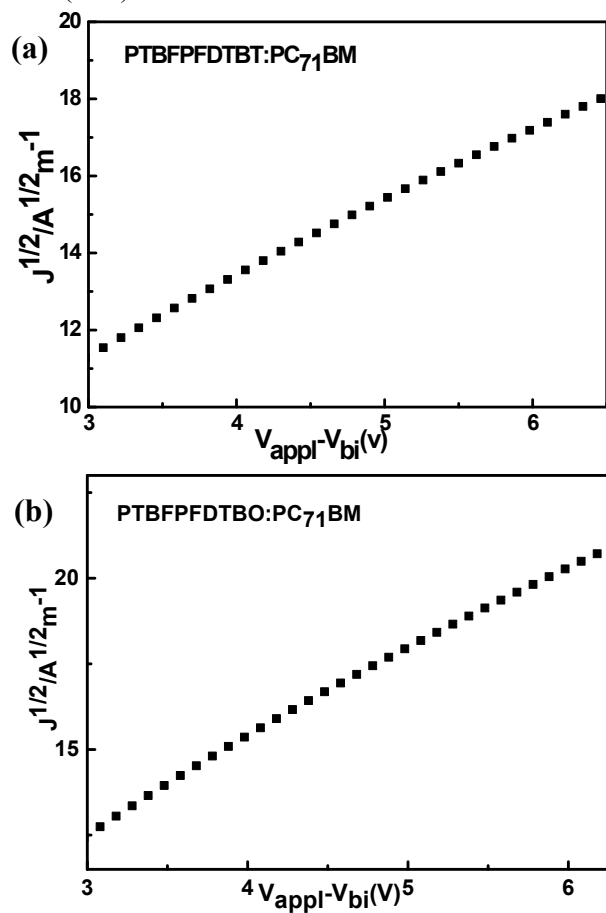

Figure S10.  $J^{1/2} - V$  curves of TBFPF-BT (a) and TBFPF-BO (b) without DIO.
